# Supplementary material for: Iron and nitrogen Co-doped CoSe2 nanosheet arrays for robust electrocatalytic water oxidation
Source: Royal Society of Chemistry journal article supplement (doi:10.1039/d1qi00113b), 2021-01-01
Supplement: d1qi00113b1.pdf [file d1qi00113b1.pdf]

*Electronic Supplementary information for*

## **Iron and Nitrogen Co-doped CoSe<sub>2</sub> Nanosheet Arrays for Robust Electrocatalytic Water Oxidation**

Di Li<sup>a</sup>, Yingying Xing<sup>a</sup>, Changjian Zhou<sup>a</sup>, Yikai Lu<sup>b</sup>, Shengjie Xu<sup>b</sup>, Xiangli Shi<sup>a</sup>, Deli Jiang<sup>\*</sup>, and Weidong Shi<sup>b,\*</sup>

<sup>a</sup> Institute for Energy Research, Jiangsu University, Zhenjiang 212013, China

<sup>b</sup> School of Chemistry and Chemical Engineering, Jiangsu University, Zhenjiang 212013, China

Corresponding author: Deli Jiang; Weidong Shi

E-mail address:

dlj@ujs.edu.cn (D. Jiang)

swd1978@ujs.edu.cn (W. Shi)

|                                                                                                                                                                       |    |
|-----------------------------------------------------------------------------------------------------------------------------------------------------------------------|----|
| <b>Fig. S1</b> SEM and TEM images of precursor.....                                                                                                                   | 3  |
| <b>Fig. S2</b> FT-IR spectra of the as-obtained samples.....                                                                                                          | 4  |
| <b>Fig. S3</b> SEM images of CoSe <sub>2</sub> -based catalysts.....                                                                                                  | 5  |
| <b>Fig. S4</b> N <sub>2</sub> adsorption-desorption isotherms for catalysts. ....                                                                                     | 6  |
| <b>Fig. S5</b> STEM-EDX spectrum of the Fe-N-CoSe <sub>2</sub> .....                                                                                                  | 7  |
| <b>Fig. S6</b> LSV of Fe-CoSe <sub>2</sub> catalyst with different Fe content.....                                                                                    | 8  |
| <b>Fig. S7</b> Cyclic voltammogram (CV) curves of the catalysts with different scan rates.....                                                                        | 9  |
| <b>Fig. S8</b> CVs of samples in PBS solution (pH = 7) at a scan rate of 50 mV s <sup>-1</sup> .....                                                                  | 11 |
| <b>Fig. S9</b> Turnover frequency (TOF) curves of the catalysts. ....                                                                                                 | 12 |
| <b>Fig. S10</b> A digital photograph showing the continuous generation of O <sub>2</sub> bubbles on the Fe-N-CoSe <sub>2</sub> catalyst. ....                         | 14 |
| <b>Fig. S11</b> Collect the generated O <sub>2</sub> by the drainage method and record the data every 5 minutes...15                                                  |    |
| <b>Fig. S12</b> TEM images of Fe-N-CoSe <sub>2</sub> electrocatalyst after long-term OER durability test.....                                                         | 16 |
| <b>Fig. S13</b> XRD of Fe-N-CoSe <sub>2</sub> electrocatalyst after long-term OER durability test. ....                                                               | 17 |
| <b>Fig. S14</b> XPS analysis of Fe-N-CoSe <sub>2</sub> electrocatalyst after long term OER stability test. ....                                                       | 18 |
| <b>Table S1</b> The physical properties of all as-prepared materials. ....                                                                                            | 19 |
| <b>Table S2</b> Composition of CoSe <sub>2</sub> -based catalysts. ....                                                                                               | 20 |
| <b>Table S3</b> Comparison of OER performance of Fe-N-CoSe <sub>2</sub> catalyst with the most efficient non-noble metal catalysts recently reported in 1 M KOH. .... | 21 |
| <b>References</b> .....                                                                                                                                               | 22 |

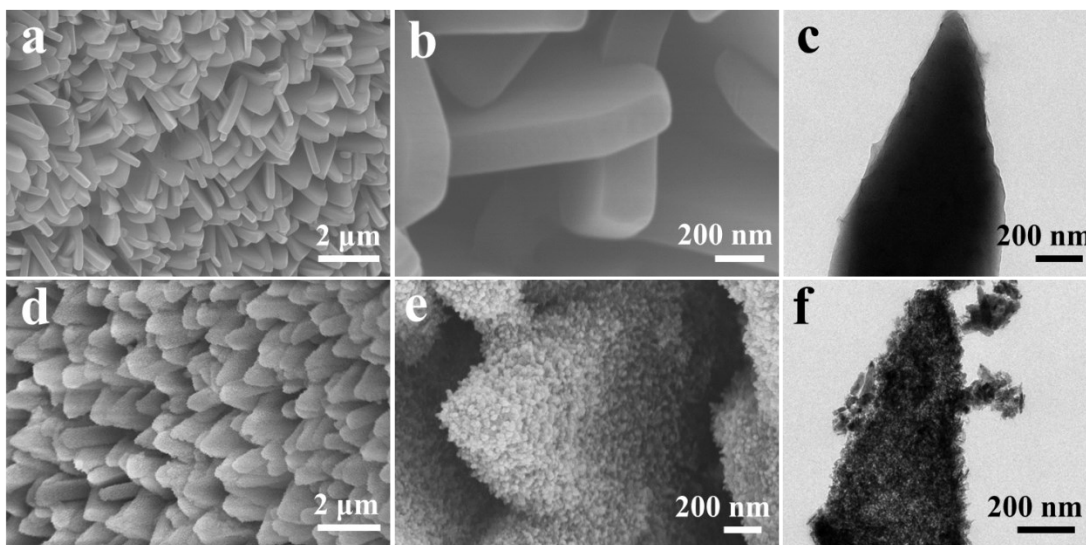

**Fig. S1** SEM and TEM images of precursor: (a-c) Co-MOF, (d-f) CoFe-PBA.

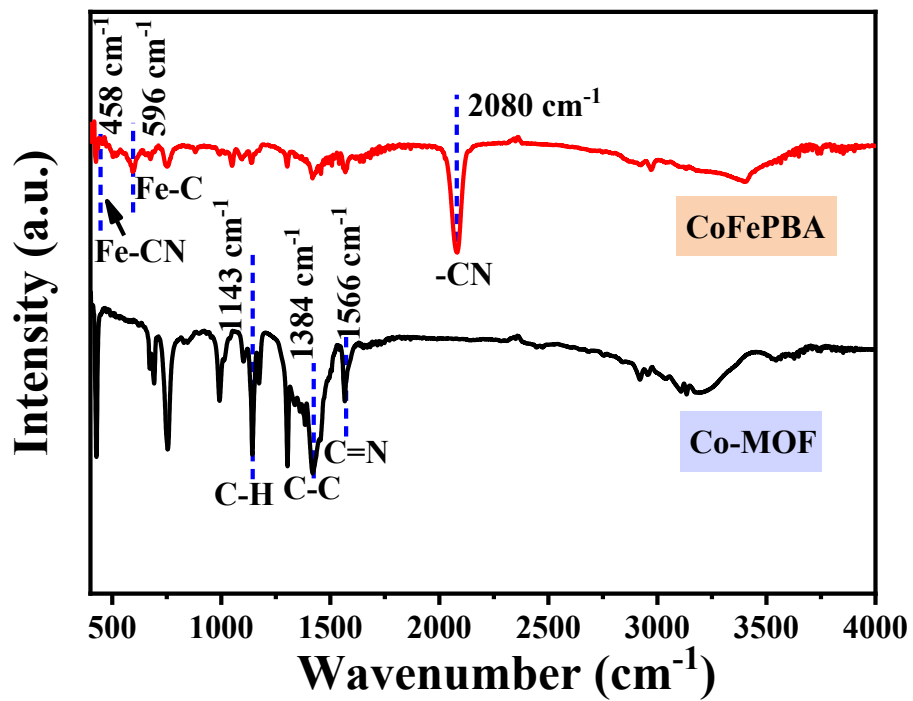

Fig. S2 FT-IR spectra of the as-obtained Co-MOF and CoFe-PBA.

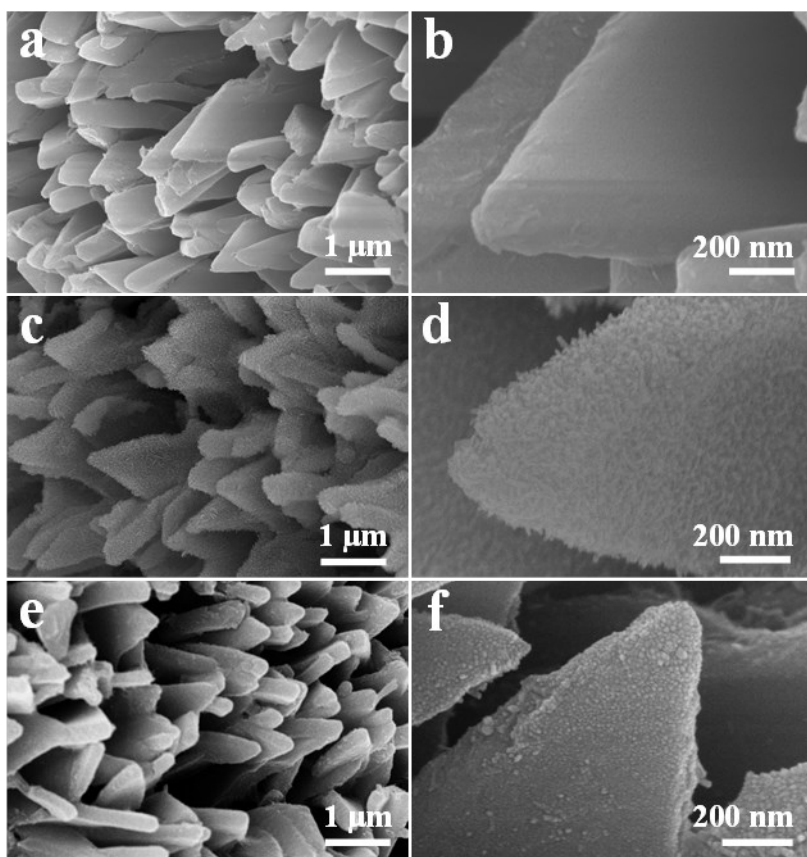

**Fig. S3** SEM images of CoSe<sub>2</sub>-based catalysts: (a, b) CoSe<sub>2</sub>, (c, d) Fe-CoSe<sub>2</sub>, and (e, f) N-CoSe<sub>2</sub>.

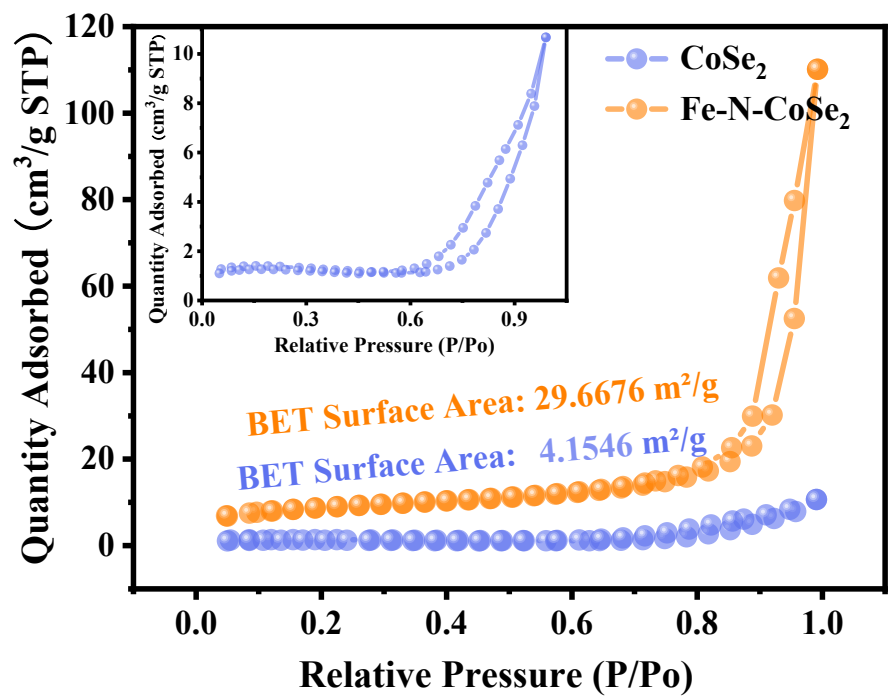

**Fig. S4** N<sub>2</sub> adsorption-desorption isotherms for CoSe<sub>2</sub> and Fe-N-CoSe<sub>2</sub> catalyst, respectively.

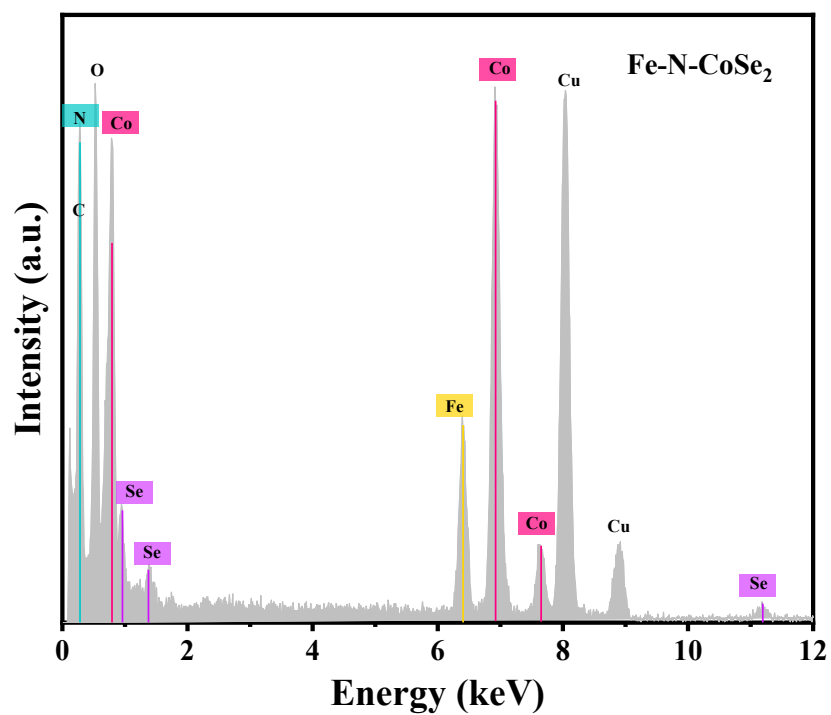

**Fig. S5** STEM-EDX spectrum of the Fe-N-CoSe<sub>2</sub>. The peaks of Cu are originated from the copper grid.

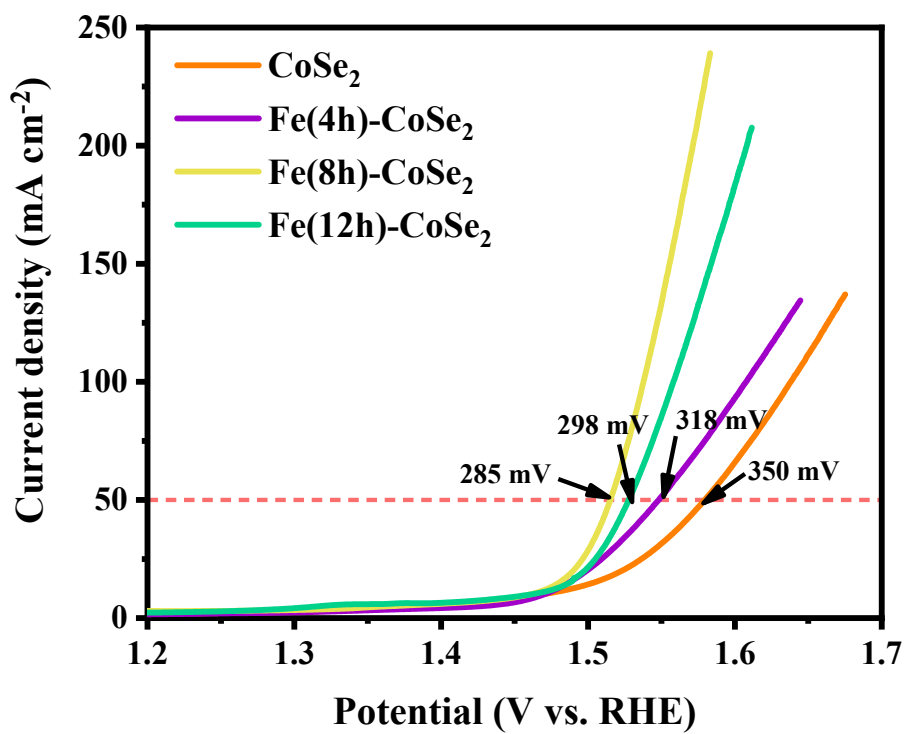

**Fig. S6** LSV of Fe-CoSe<sub>2</sub> catalyst with different Fe content for OER in 1 M KOH solution.



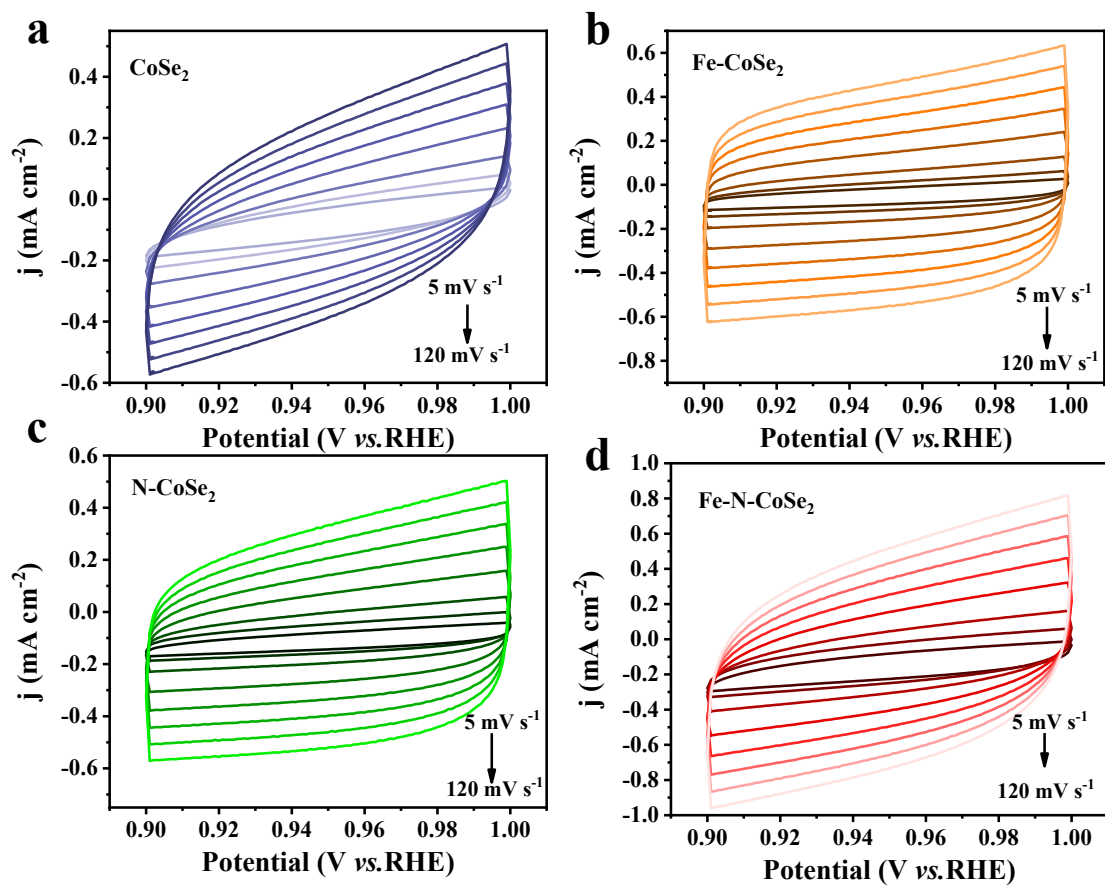

**Fig. S7** Cyclic voltammogram (CV) curves of the catalyst. (a) CoSe<sub>2</sub>, (b) Fe-CoSe<sub>2</sub> (c) N-CoSe<sub>2</sub> and (d) Fe-N-CoSe<sub>2</sub> in 1 M KOH between 0.9 V and 1.0 V vs. RHE.

**TOF calculation process:**

By using the previous reported method to calculate the TOF of CoSe<sub>2</sub>, Fe-CoSe<sub>2</sub>, N-CoSe<sub>2</sub>, Fe-N-CoSe<sub>2</sub>, CV measurements with potential window from 0.6 V to 1.2 V vs. RHE were carried out in phosphate buffered saline (PBS, pH = 7), where we assumed that no oxygen evolution reaction together with electrochemical corrosion of our samples happened.

The TOF could be calculated with the following equation:

$$\text{TOF} = I/Q$$

Where I (A) is the current of the polarization curve, we obtained it from the LSVs measurements. Voltammetric charges (Q) is calculated by the following equation:

$$Q = 4Fn$$

Where F is Faraday constant (96480 C mol<sup>-1</sup>), n is the number of active sites. In the experiment, the voltammetry curve is obtained by CVs measurements with phosphate buffer (pH = 7) at a scan rate of 50 mV s<sup>-1</sup>. When the number of voltammetric (Q) is obtained after deduction of the blank value.

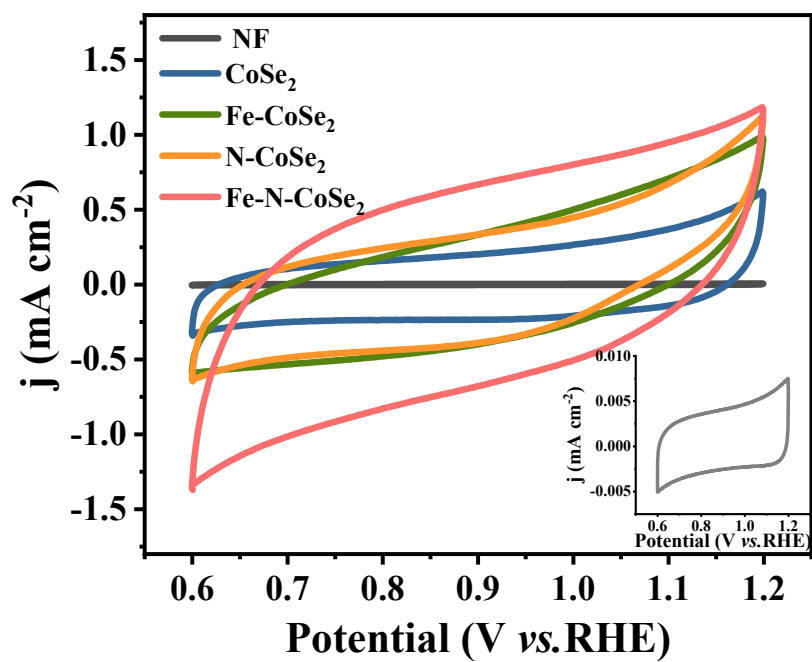

**Fig. S8** CVs of sample NF, CoSe<sub>2</sub>, Fe-CoSe<sub>2</sub>, N-CoSe<sub>2</sub> and Fe-N-CoSe<sub>2</sub> in PBS solution (pH = 7) at a scan rate of 50 mV s<sup>-1</sup>.

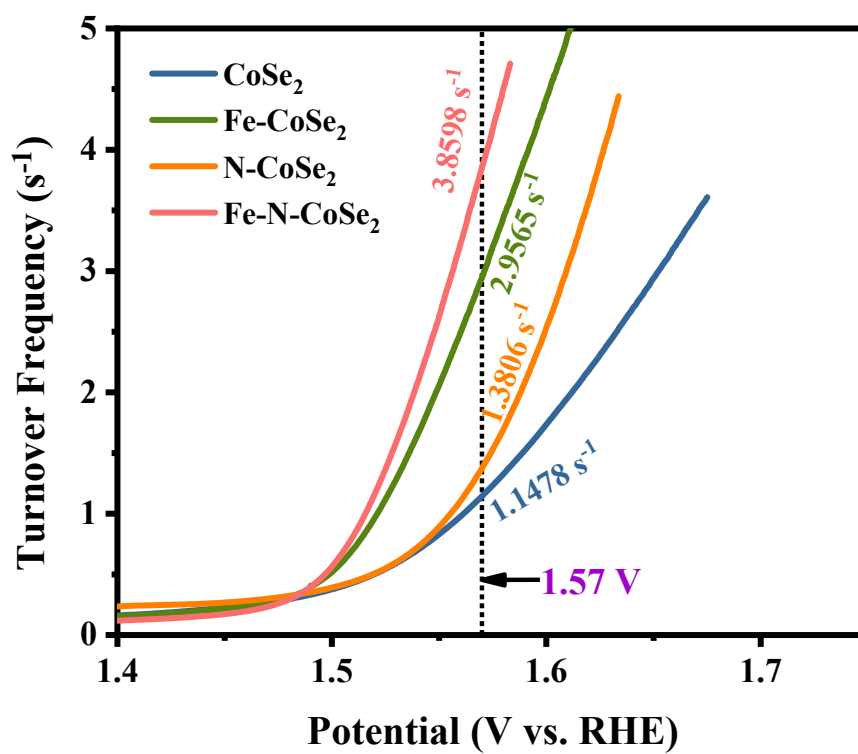

**Fig. S9** Turnover frequency (TOF) curves of the  $CoSe_2$ ,  $Fe-CoSe_2$ ,  $N-CoSe_2$  and  $Fe-N-CoSe_2$  catalysts.

### Faraday efficiency calculation:

To investigate the Faradaic efficiency for O<sub>2</sub> evolution for Fe-N-CoSe<sub>2</sub>, O<sub>2</sub> gas was collected by a water drainage method. The corresponding theoretical value was determined by assuming the 100% conversion of electric current according to the Faraday law during the electrolysis. The data in **Fig.s S10** and **S11** show the correlation between the molar amount of O<sub>2</sub> gas produced and the time. The Faraday efficiency during OER was calculated based on the ratio of the amount of O<sub>2</sub> evolved to the theoretical value.

The theoretical number of moles of the gas calculated by the charge passed through the electrode.

$$n_g(\textit{theoretical}) = \frac{Q}{zF}$$

Where  $n_g$  is the number of moles of the gas produced,  $Q$  is the charge passed through the electrodes,  $z$  means  $z$  mole electrons per mole O<sub>2</sub> ( $z = 4$ ),  $F$  is Faraday constant (96485 C mol<sup>-1</sup>). Thus, Faradaic efficiency can be determined by the following equation:

$$FE\% = \frac{n_g(\textit{experimental})}{n_g(\textit{theoretical})} \times 100\%$$

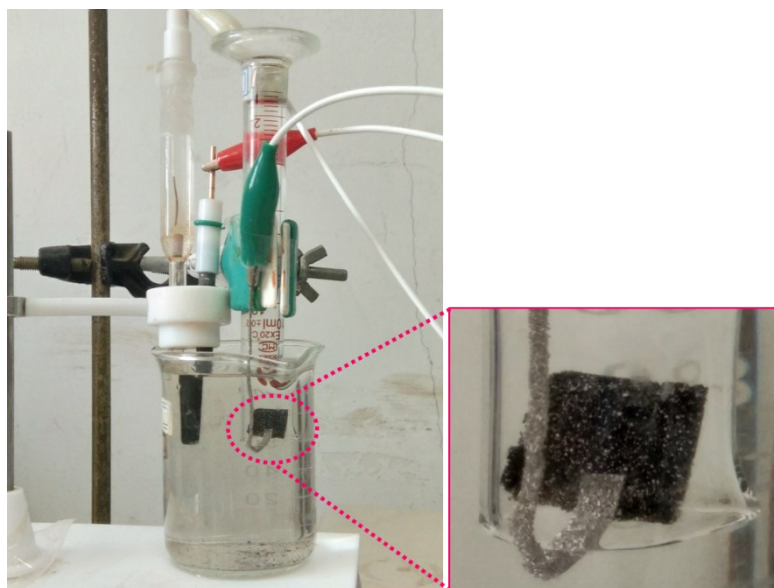

**Fig. S10** A digital photograph showing the continuous generation of O<sub>2</sub> bubbles on the Fe-N-CoSe<sub>2</sub> catalyst.

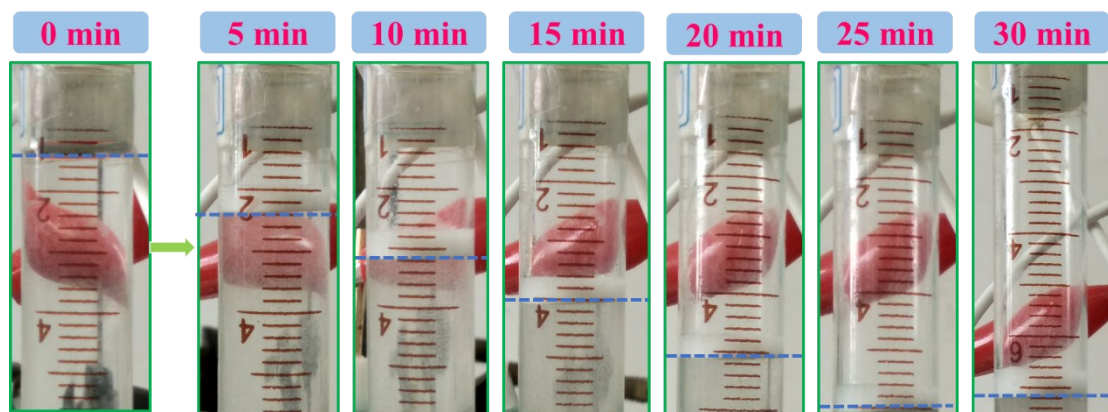

**Fig. S11** Collect the generated  $O_2$  by the drainage method and record the data every 5 minutes.

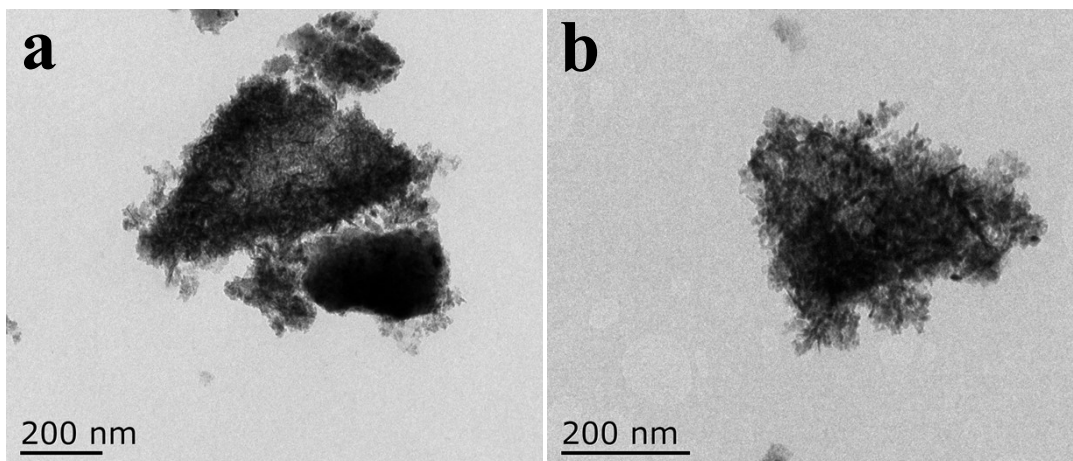

**Fig. S12** TEM images of Fe-N-CoSe<sub>2</sub> electrocatalyst after long-term OER durability test.



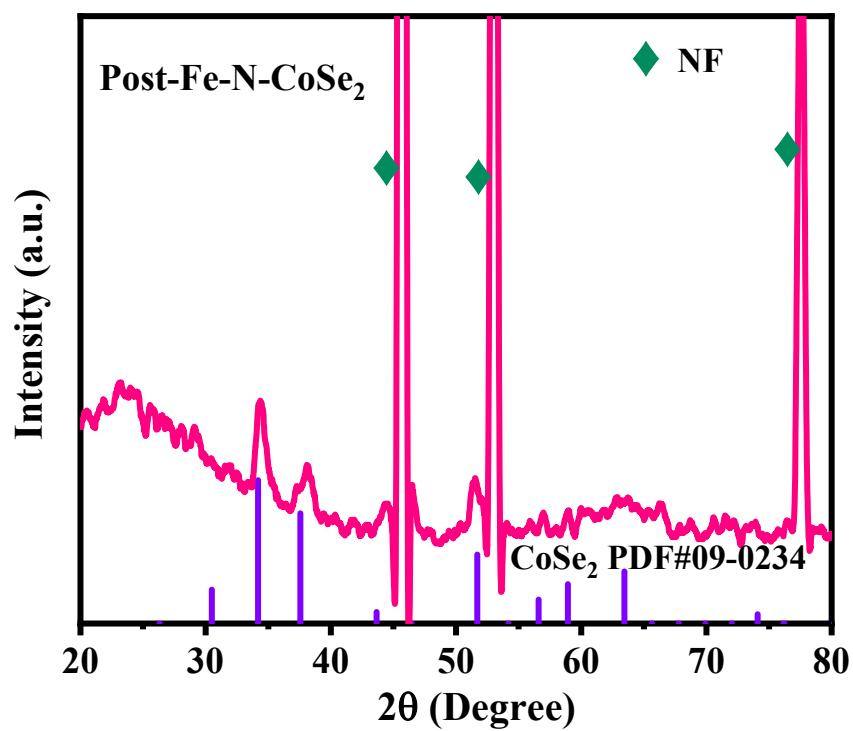

**Fig. S13** XRD of Fe-N-CoSe<sub>2</sub> electrocatalyst after long-term OER durability test.

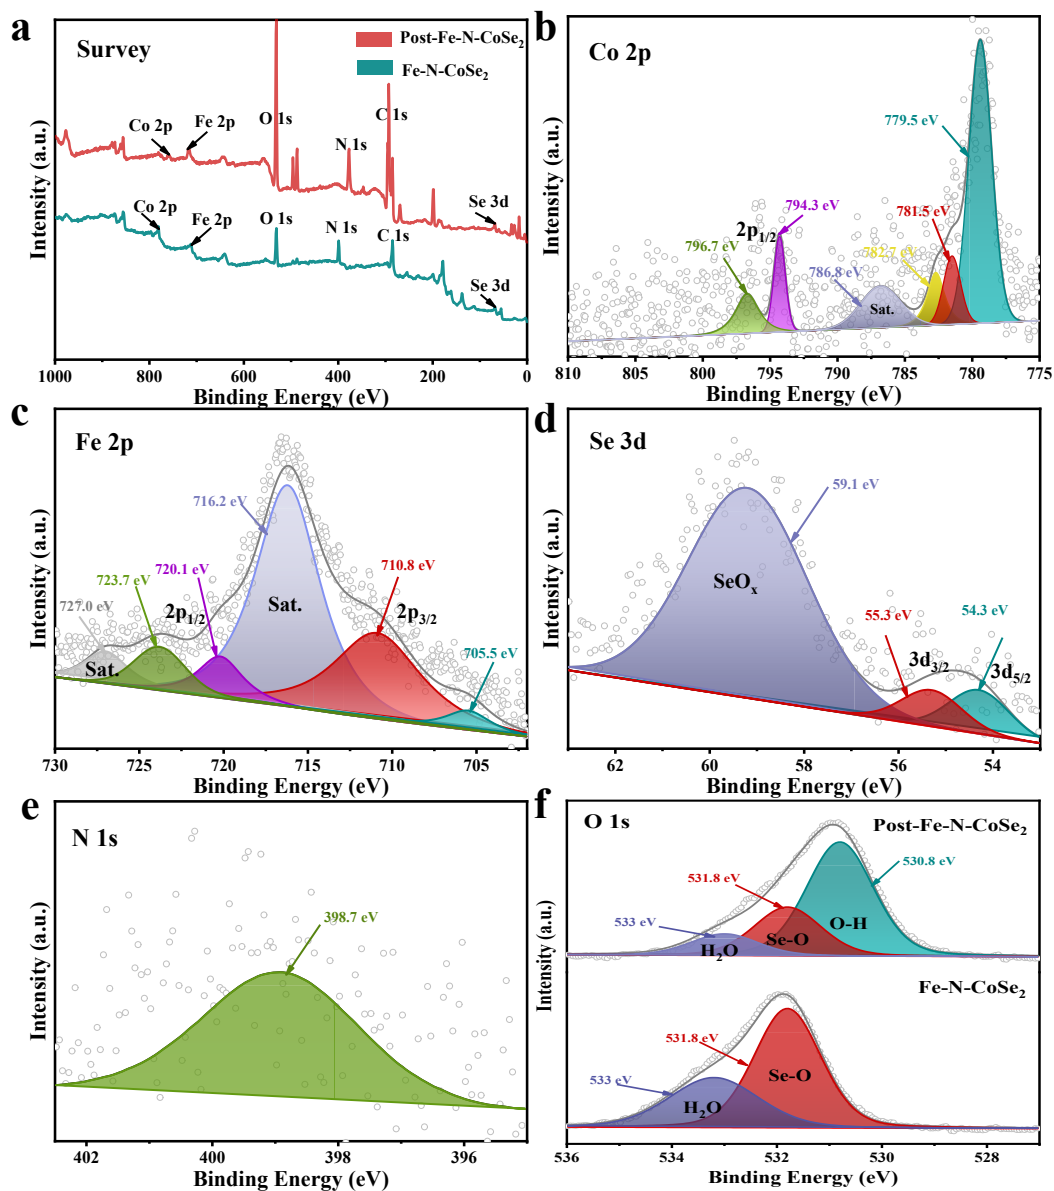

**Fig. S14** XPS analysis of Fe-N-CoSe<sub>2</sub> electrocatalyst recorded after long term OER stability test: (a) Survey of the Fe-N-CoSe<sub>2</sub> and Post-Fe-N-CoSe<sub>2</sub>, (b) Co 2p, (c) Fe 2p, (d) Se 3d, (e) N 1s and (f) O 1s of the Fe-N-CoSe<sub>2</sub> and Post Fe-N-CoSe<sub>2</sub>.

**Table S1** The physical properties of all as-prepared materials.

| Catalysts              | Nanosheet thickness (nm) | 2 $\theta$ of (210) plane ( $^{\circ}$ ) |
|------------------------|--------------------------|------------------------------------------|
| CoMOF                  | 160                      | -                                        |
| CoFePBA                | 553                      | -                                        |
| CoSe <sub>2</sub>      | 345                      | 33.84                                    |
| Fe-CoSe <sub>2</sub>   | 414                      | 33.82                                    |
| N-CoSe <sub>2</sub>    | 283                      | 34.26                                    |
| Fe-N-CoSe <sub>2</sub> | 463                      | 33.96                                    |

**Table S2** Composition of CoSe<sub>2</sub>-based catalysts.

| Catalyst               | XPS   |       |       |       |       |        |       | ICP    | EA    |
|------------------------|-------|-------|-------|-------|-------|--------|-------|--------|-------|
|                        | Co/%  | Se/%  | Fe/%  | N/%   | Se/Co | Fe/Co% | N/Se% | Fe/Co% | N/Se% |
| CoSe <sub>2</sub>      | 33.61 | 64.21 | /     | /     | 1.91  |        |       | /      | /     |
| Fe-N-CoSe <sub>2</sub> | 25.88 | 46.04 | 10.04 | 19.01 | 1.78  | 38.8   | 41.3  | 38.3   | 43.61 |

**Table S3** Comparison of OER performance of Fe-N-CoSe<sub>2</sub> catalyst with the most efficient non-noble metal catalysts recently reported in 1 M KOH.

| Catalysts                                                                        | Overpotential (mV)                                     | Tafel slope (mV dec <sup>-1</sup> ) | Electrolyte | Reference work |
|----------------------------------------------------------------------------------|--------------------------------------------------------|-------------------------------------|-------------|----------------|
| Fe-N-CoSe <sub>2</sub>                                                           | 270@50 mA cm <sup>-2</sup>                             | 63.7                                | 1M KOH      | This work      |
| S:CoP@NF                                                                         | 270@10mA cm <sup>-2</sup><br>330@50mA cm <sup>-2</sup> | 62.7                                | 1M KOH      | 1              |
| Fe <sub>x</sub> Co <sub>2-x</sub> P/NF                                           | 273@50 mA cm <sup>-2</sup>                             | 55                                  | 1M KOH      | 2              |
| Co <sub>2</sub> P@Co/N-C/GC                                                      | 320@10 mA cm <sup>-2</sup>                             | 48.8                                | 1M KOH      | 3              |
| Ni <sub>2</sub> P-CoP/GC                                                         | 320@10 mA cm <sup>-2</sup>                             | 69                                  | 1M KOH      | 4              |
| Co <sub>0.85</sub> Se@NC                                                         | 320@10 mA cm <sup>-2</sup>                             | 75                                  | 1M KOH      | 5              |
| NiSe/NF                                                                          | 270@20 mA cm <sup>-2</sup>                             | 64                                  | 1M KOH      | 6              |
| Ni <sub>0.88</sub> Co <sub>1.22</sub> Se <sub>4</sub>                            | 340@10 mA cm <sup>-2</sup>                             | 78                                  | 1M KOH      | 7              |
| Ni-Co-P HNB                                                                      | 270@10 mA cm <sup>-2</sup>                             | 76                                  | 1M KOH      | 8              |
| NiCoPO/NC                                                                        | 300@10 mA cm <sup>-2</sup>                             | 94                                  | 1M KOH      | 9              |
| N-CNTs@NiS <sub>2</sub> /Fe <sub>7</sub> S <sub>8</sub>                          | 330@50 mA cm <sup>-2</sup>                             | 51.49                               | 1M KOH      | 10             |
| Fe-UNT                                                                           | 270@10 mA cm <sup>-2</sup>                             | 36.3                                | 1M KOH      | 11             |
| NiCo-LDH@FeOOH/CF                                                                | 224@10 mA cm <sup>-2</sup>                             | 38                                  | 1M KOH      | 12             |
| CoFePO                                                                           | 274.5@10 mA cm <sup>-2</sup>                           | 51.7                                | 1M KOH      | 13             |
| NiCoFeP                                                                          | 273@10 mA cm <sup>-2</sup>                             | 35                                  | 1M KOH      | 14             |
| Fe <sub>5</sub> Co <sub>4</sub> Ni <sub>20</sub> Se <sub>36</sub> B <sub>x</sub> | 279.8@10 mA cm <sup>-2</sup>                           | 59.5                                | 1M KOH      | 15             |

## References

- [1] M. A. R. Anjum, M. S. Okyay, M. Kim, M. H. Lee, N. Park, J. S. Lee, Bifunctional sulfur-doped cobalt phosphide electrocatalyst outperforms all-noble-metal electrocatalysts in alkaline electrolyzer for overall water splitting, *Nano Energy*, 2018, **53**, 286.
- [2] T. I. Singh, G. Rajeshkhanna, S. B. Singh, T. Kshetri, N. H. Kim, J. H. Lee, Metal-organic framework-derived Fe/Co-based bifunctional electrode for H<sub>2</sub> production through water and urea electrolysis, *ChemSusChem*, 2019, **12**, 1–15.
- [3] C. Zhu, S. Fu, B. Z. Xu, J. Song, Q. Shi, M. H. Engelhard, X. Li, S. P. Beckman, J. Sun, D. Du, Y. Lin, Sugar blowing-induced porous cobalt phosphide/nitrogen-doped carbon nanostructures with enhanced electrochemical oxidation performance toward water and other small molecules, *Small*, 2017, **13**, 1700796.
- [4] X. Liang, B. Zheng, L. Chen, J. Zhang, Z. Zhuang, B. Chen, MOF-derived formation of Ni<sub>2</sub>P-CoP bimetallic phosphides with strong interfacial effect towards electrocatalytic water splitting, *ACS Appl. Mater. Interfaces*, 2017, **9**, 23222–23229.
- [5] T. Meng, J. W. Qin, S. G. Wang, D. Zhao, B. G. Mao, M. H. Cao, In situ coupling of Co<sub>0.85</sub>Se and N-doped carbon via one-step selenization of metal-organic frameworks as a trifunctional catalyst for overall water splitting and Zn-air batteries, *J. Mater. Chem. A*, 2017, **5**, 7001–7014.
- [6] C. Tang, N. Y. Cheng, Z. H. Pu, W. Xing, X. P. Sun, NiSe nanowire film supported on nickel foam: an efficient and stable 3D bifunctional electrode for full water splitting, *Angew. Chem. Int. Ed.*, 2015, **54**, 9351–9355.

- [7] D. V. Shinde, L. D. Trizio, Z. Y. Dang, M. Prato, R. Gaspari, L. Manna, Hollow and porous nickel cobalt perselenide nanostructured microparticles for enhanced electrocatalytic oxygen evolution, *Chem. Mater.*, 2017, **29**, 7032–7041.
- [8] E. L. Hu, Y. F. Feng, J. W. Nai, D. Zhao, Y. Hu, X. W. Lou, Construction of hierarchical Ni-Co-P hollow nanobricks with oriented nanosheets for efficient overall water splitting, *Energy Environ. Sci.*, 2018, **11**, 872–880.
- [9] C. S. Wang, W. B. Chen, D. Yuan, S. S. Qian, D. D. Cai, J. T. Jiang, S. Q. Zhang, Tailoring the nanostructure and electronic configuration of metal phosphides for efficient electrocatalytic oxygen evolution reactions, *Nano Energy*, 2020, **69**, 104453.
- [10] J. Y. Wang, W. T. Liu, X. P. Li, T. Ouyang, Z. Q. Liu, Strong hydrophilicity NiS<sub>2</sub>/Fe<sub>7</sub>S<sub>8</sub> heterojunctions encapsulated in N-doped carbon nanotubes for enhanced oxygen evolution reaction, *Chem. Commun.*, 2020, **56**, 1489–1492.
- [11] G. Q. Shen, R. R. Zhang, L. Pan, F. Hou, Y. J. Zhao, Z. Y. Shen, W. B. Mi, C. X. Shi, Q. F. Wang, X. W. Zhang, J. J. Zou, Regulating spin state of Fe(III) by atomically anchoring on ultrathin titanium dioxide for efficient oxygen evolution electrocatalysis, *Angew. Chem. Int. Ed.*, 2020, **59**, 2313–2317.
- [12] X. T. Han, Y. Y. Niu, C. Yu, Z. B. Liu, H. W. Huang, H. L. Huang, S. F. Li, W. Guo, X. Y. Tan, J. S. Qiu, Ultrafast construction of interfacial sites by wet chemical etching to enhance electrocatalytic oxygen evolution, *Nano Energy*, 2020, **69**, 104367.
- [13] J. J. Duan, S. Chen, A. Vasileff, S. Z. Qiao, Anion and cation modulation in metal

compounds for bifunctional overall water splitting, *ACS Nano*, 2016, **10**, 8738–8745.

[14] Y. N. Guo, J. Tang, Z. L. Wang, Y. Sugahara, Y. Yamauchi, Hollow porous heterometallic phosphide nanocubes for enhanced electrochemical water splitting, *Small*, 2018, **14**, 1802442.

[15] Y. P. Zuo, D. W. Rao, S. N. Ma, T. T. Li, Y. H. Tsang, S. Kment, Y. Chai, Valence engineering via dual-cation and boron doping in pyrite selenide for highly Efficient oxygen evolution, *ACS Nano*, 2019, **13**, 11469–11476.
